# Supplementary material for: Heterologous Expression of Two Brassica campestris CCCH Zinc-Finger Proteins in Arabidopsis Induces Cytoplasmic Foci and Causes Pollen Abortion
Source: MDPI journal article supplement (doi:10.3390/ijms242316862), 2023-11-28
Supplement: s1 [file s1]

## Supplementary Materials

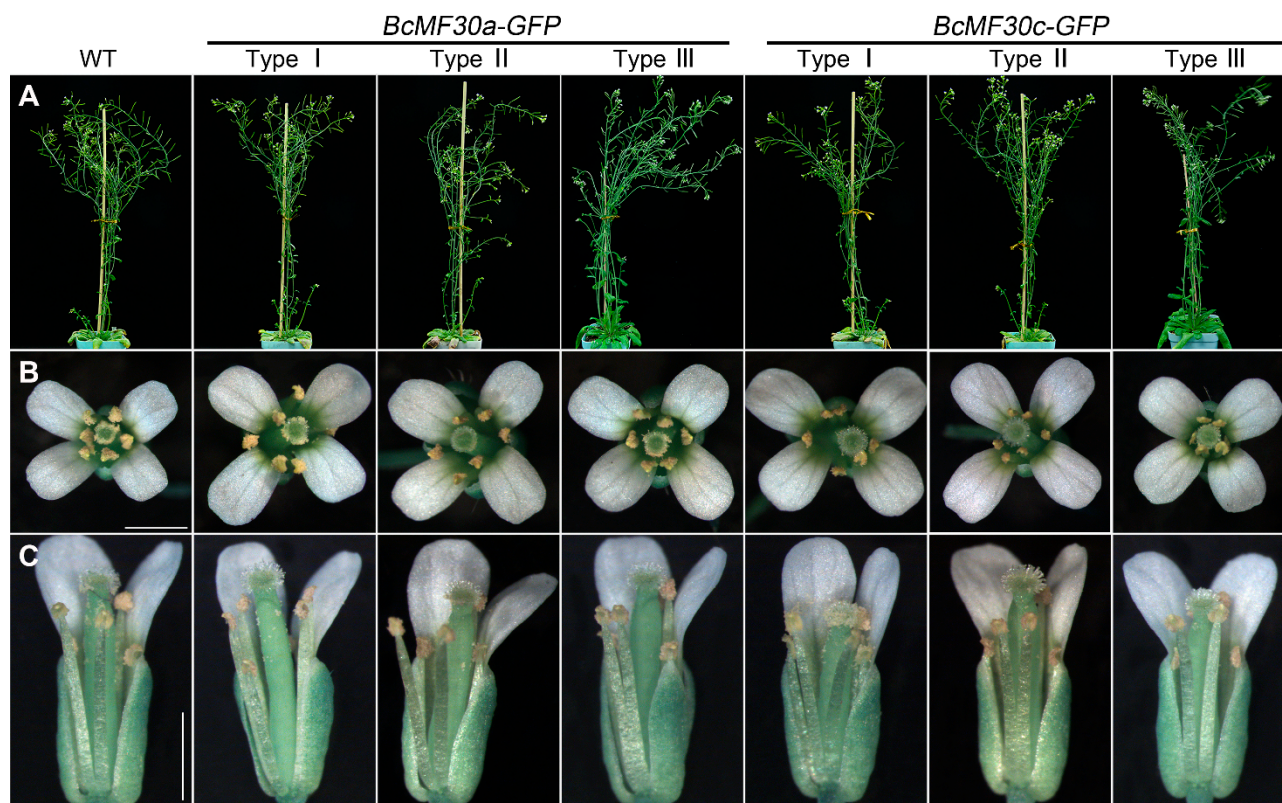

**Figure S1.** Heterologous expression of *BcMF30a* and *BcMF30c* in *Arabidopsis* does not affect the morphology of plants and floral organs. **(A)** Morphological observation of different types of *BcMF30a-GFP* and *BcMF30c-GFP* transgenic plants. Top views **(B)** and side views **(C)** of flowers from different types of *BcMF30a-GFP* and *BcMF30c-GFP* transgenic plants. Bars = 1mm in **(B, C)**.

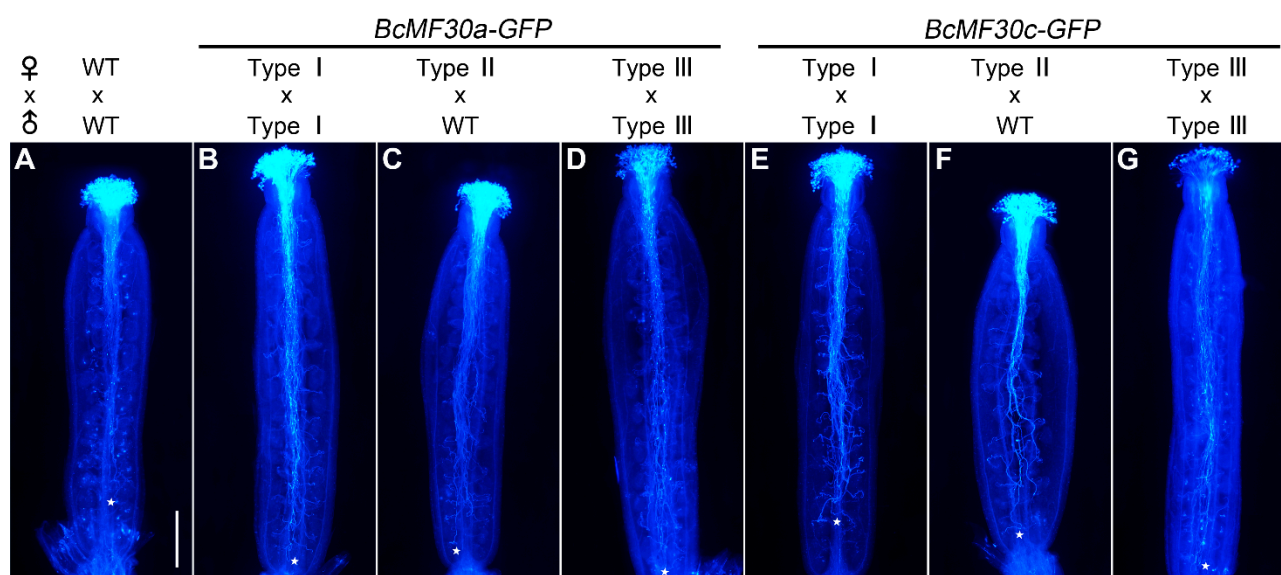

**Figure S2.** *In vivo* pollen germination tests showed that the pistils of all types of *BcMF30a-GFP* and *BcMF30c-GFP* transgenic plants developed normally. Self-pollination or wild-type pollen grains pollinated on the pistils of transgenic plants for 24 h. The asterisks indicated the end position of pollen tubes. Bars = 100  $\mu$ m.

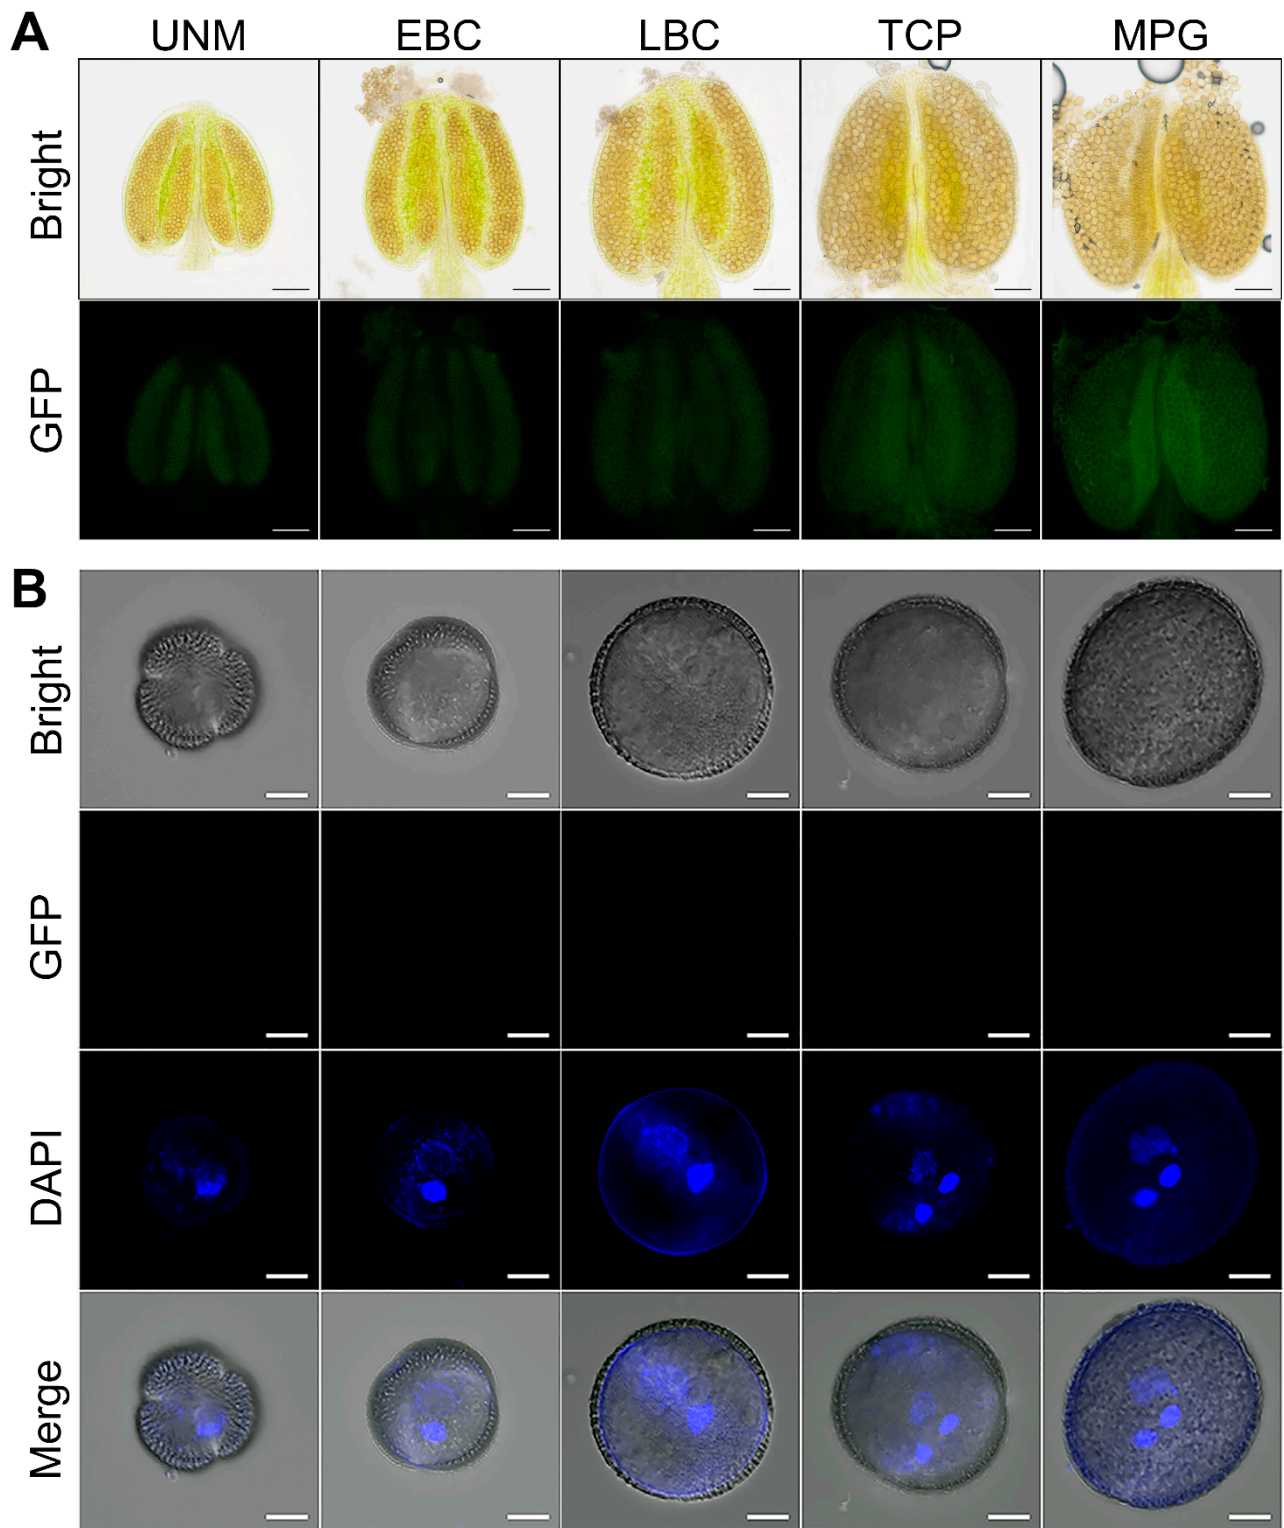

**Figure S3.** The anther development (**A**) and pollen development (**B**) of wild-type plants. UNM, uninucleate microspore; EBC, early bicellular pollen; LBC, late bicellular pollen; TCP, immature tricellular pollen; and MPG, mature pollen grain. Bars = 100  $\mu$ m in (**A**), 5  $\mu$ m in (**B**).

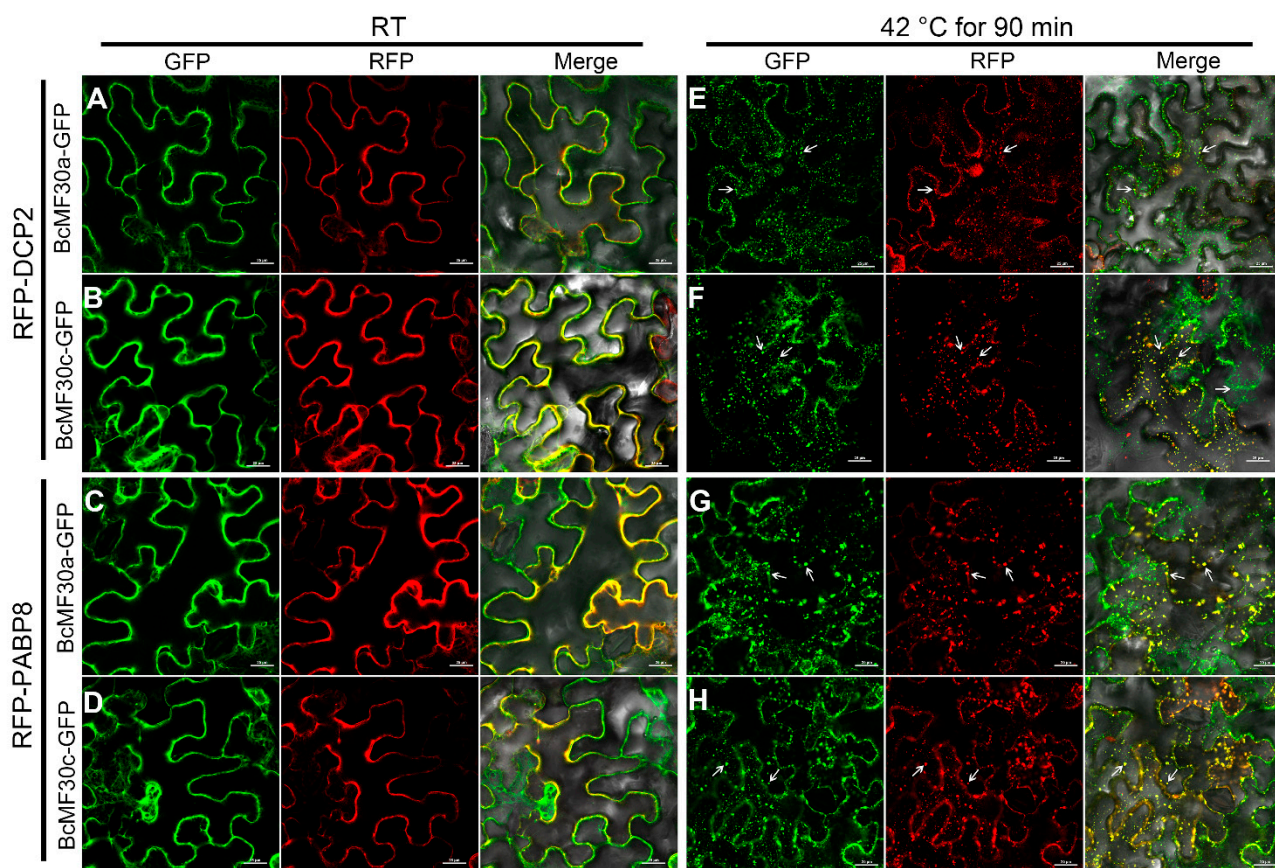

**Figure S4.** BcMF30a-GFP and BcMF30c-GFP can co-localized with PB and SG marker proteins in *Nicotiana benthamiana* leaf epidermal cells after heat treatment. DCP2 and PABP8 are marker proteins of PB and SG, respectively. Both BcMF30a-GFP and BcMF30c-GFP were dispersed in cytoplasm at room temperature (RT) when co-expressed with RFP-DCP2 (A,B) and RFP-PABP8 (C,D), respectively. After heat treatment at 42°C for 90 min, both BcMF30a-GFP and BcMF30c-GFP formed cytoplasmic foci and co-localized with RFP-DCP2 and RFP-PABP8 (E–H). Pictures represent white field images (Bright), epifluorescence (GFP and RFP) and merged images (Merge). Bar =25 μm.

**Table S1 Sequences of primers used in this study.**

| Experiment              | Primer Name | Sequence-F(5'-3')                        | Sequence-R(5'-3')                        |
|-------------------------|-------------|------------------------------------------|------------------------------------------|
| GFP CDS                 | GFP-F/R     | GACAGTTACCATGGTGAGCAAG<br>GGCG           | TGATCCCGGGGATCCCTAGGATCCCT<br>TGTACAGCTC |
| NOS PCR                 | NOS-1F/R    | TCTAGAGGATCCCCGGGATCAA<br>CAACTCTCCTGGCG | GACGGCCAGTGAATTCCCGATCTAG                |
| pBI121(-GUS) Test       | NOS-2F/R    | AACGCAATTAATGTGAGTTAGC                   | GACGGCCAGTGAATTCCCGATCTAG                |
| <i>BcMF30a-GFP</i> Test | BcMF30a-F/R | AGGACGGTTGTGCTATCT                       | TGTAAAACGACGGCCAGT                       |
| <i>BcMF30c-GFP</i> Test | BcMF30c-F/R | CGGAGAATCCATTGTGAA                       | TGTAAAACGACGGCCAGT                       |
| qRT-PCR                 | qRT-PCR-F/R | ATTACTCCTACCTCGGCTTCT                    | AACCGTTCTGCTTGTTCTT                      |
| TUB4 qRT-PCR            | TUB4-F/R    | AAGGCTTTCCTTCATTGGTACA                   | CTCTCCGGCTGTAGCATCTT                     |
